# Supplementary material for: Addressing the antibody germline bias and its effect on language models for improved antibody design
Source: PubMed Central journal article supplement — Bioinformatics. 2024 Oct 26;40(11):btae618. doi: 10.1093/bioinformatics/btae618 (PMC11543624; doi:10.1093/bioinformatics/btae618), 2024-10-26
Supplement: btae618_supplementary_data.pdf [file btae618_supplementary_data.pdf]

# Supplementary Information: Addressing the antibody germline bias and its effect on language models for improved antibody design

Tobias H. Olsen<sup>1,2</sup>, Iain H. Moal<sup>1</sup> and Charlotte M. Deane<sup>2</sup>

<sup>1</sup> GSK Medicines Research Centre, GSK, Stevenage SG1 2NY, United Kingdom

<sup>2</sup> Department of Statistics, University of Oxford, Oxford OX1 3LB, United Kingdom

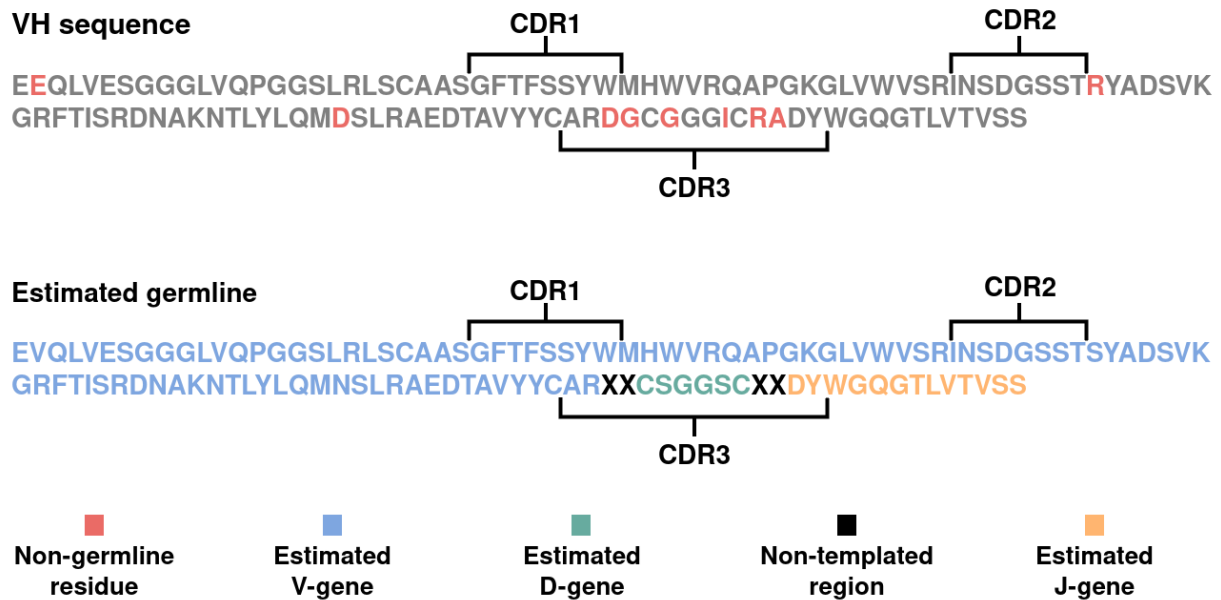

Figure S1: Example of a VH sequence compared to its germline sequence estimated by IgBLAST [39]. Residues are labelled as non-germline (NGL) residues (red) when different from the estimated germline or part of a non-templated region.

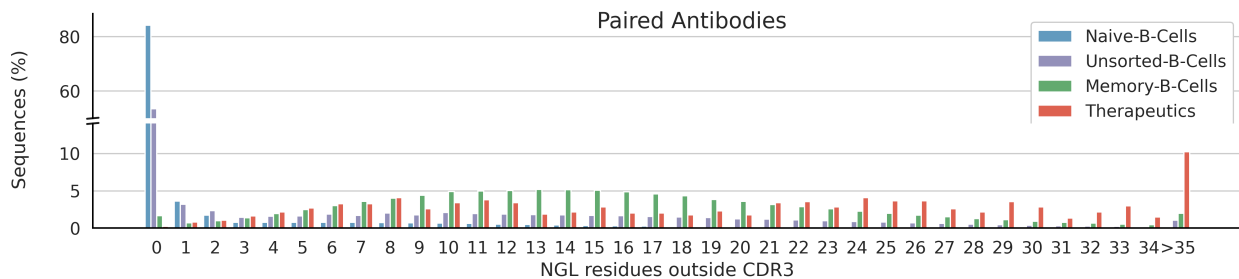

Figure S2: Distribution of NGL residues per VH-VL domain by source. Naive B-cell derived antibodies predominantly lack NGL residues, while memory B-cell derived antibodies display an average of  $\sim 15.3$ . Therapeutic antibodies exhibit an average of  $\sim 20.3$  NGL residues.

|             | Non-germline residues |        |       |        |
|-------------|-----------------------|--------|-------|--------|
|             | Heavy                 |        | Light |        |
|             | FWR                   | CDR1/2 | FWR   | CDR1/2 |
| ESM-2       | 241.7                 | 155.3  | 158.3 | 116.8  |
| AntiBERTy   | 595.2                 | 360.4  | 848.1 | 398.5  |
| AbLang-1    | 31.8                  | 19.8   | 55.1  | 26.4   |
| Ab-Unpaired | 361.8                 | 245.4  | 229.4 | 113.4  |
| Ab-Paired   | 197.4                 | 110.6  | 293.5 | 117.0  |
| Ab-FL       | 22.7                  | 23.7   | 24.5  | 22.7   |
| Ab-ModMask  | 27.0                  | 28.2   | 30.0  | 26.1   |
| Ab-FT       | 26.9                  | 28.6   | 29.0  | 27.3   |
| AbLang-2    | 21.5                  | 21.4   | 23.7  | 20.6   |

Table S1: Comparison of perplexity computed when predicting NGL residues which has been reverted to the germline in the input. Comparison is between the general protein language model (LM) ESM-2 [18], the antibody-specific LMs AntiBERTy [22] and AbLang-1 [24], and our new selection of antibody-specific LMs (see Methods 2.4). Although AbLang-2 shows the best performance, its perplexity is only slightly better than random, highlighting the need for further work to enable LMs to suggest mutations away from a know germline.

|             | Non-germline residues |        |       |        |
|-------------|-----------------------|--------|-------|--------|
|             | Heavy                 |        | Light |        |
|             | FWR                   | CDR1/2 | FWR   | CDR1/2 |
| ESM-2       | 3.0                   | 3.3    | 2.5   | 2.0    |
| AntiBERTy   | 2.8                   | 2.2    | 3.3   | 2.2    |
| AbLang-1    | 25.5                  | 19.2   | 39.7  | 18.1   |
| Ab-Unpaired | 2.9                   | 2.2    | 3.1   | 2.3    |
| Ab-Paired   | 4.7                   | 3.5    | 6.5   | 3.7    |
| Ab-FL       | 2.8                   | 2.8    | 3.1   | 2.7    |
| Ab-ModMask  | 2.5                   | 2.3    | 2.7   | 2.3    |
| Ab-FT       | 2.6                   | 2.5    | 2.8   | 2.4    |
| AbLang-2    | 2.9                   | 2.9    | 2.9   | 2.6    |

Table S2: Comparison of perplexity computed when predicting unmasked NGL residues. Comparison is between the general protein language model (LM) ESM-2 [18], the antibody-specific LMs AntiBERTy [22] and AbLang-1 [24], and our new selection of antibody-specific LMs (see Methods 2.4). With the exception of AbLang-1, all models predict unmasked NGL residues with similar low perplexity. This is likely because AbLang-1 was trained on a significantly reduced set of antibody sequences, having therefore seen fewer NGL residues during training.

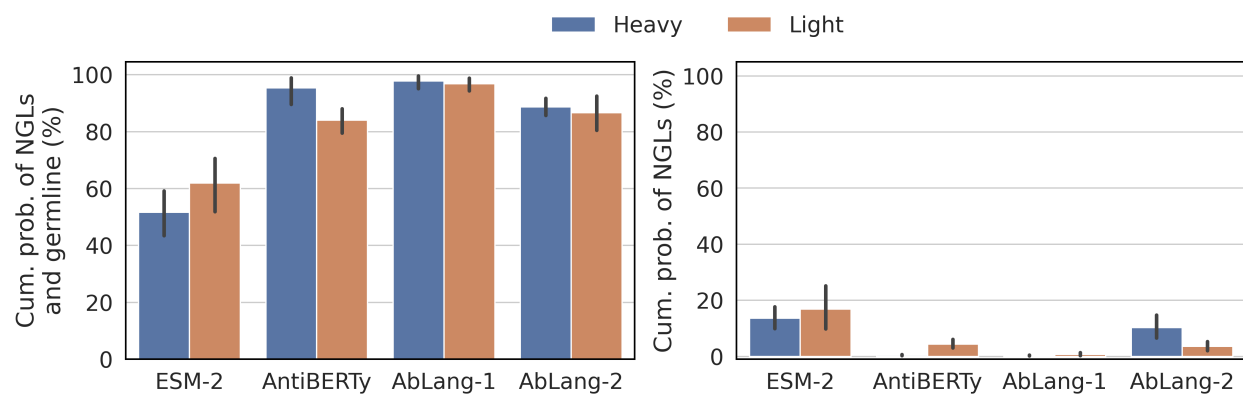

Figure S3: Comparison of cumulative probabilities of valid residues for the general protein language model (LM) ESM-2 [18] and the antibody-specific LMs AntiBERTy [22], AbLang-1 [24] and AbLang-2. Clonotypes were formed by grouping antibodies by source, V/J genes, and identical CDR3s. The strict clonotyping yielded 39 and 13 sites with two known NGL residues outside of the CDR3 in VHs and VLs, respectively, and a single site with three in a VH. The cumulative probabilities for known NGL residues and the germline for AntiBERTy, AbLang-1, and AbLang-2 are >80%. ESM-2 presents 52% and 62% for the VHs and VLs. The cumulative probabilities for known NGL residues for AntiBERTy and AbLang-1 show <1% for the VH, while ESM-2 and AbLang-2 display 13.6% and 10.3%. For the VL, values are 4.4% and 0.7% for AntiBERTy and AbLang-1, and 16.9% and 3.6% for ESM-2 and AbLang-2.
